# Supplementary material
Source: PubMed Central journal article supplement (PMC7964811)
Supplement: 2746_tables.pdf [file 2746_tables.pdf]

**On-line Table 1: Spearman correlation coefficients for mismatch, collateralization, TIMI, TTR, and age with infarct growth and mRS score for all patients and the Penumbra subgroup<sup>a</sup>**

| CT/DSA/Clinical Parameter | Tissue/Clinical Outcome | Whole Group         |                   | Penumbra Group      |                   |
|---------------------------|-------------------------|---------------------|-------------------|---------------------|-------------------|
|                           |                         | Spearman            | P                 | Spearman            | P                 |
| Mismatch                  | Infarct growth          | -0.476 <sup>b</sup> | .007 <sup>b</sup> | -0.511 <sup>b</sup> | .018 <sup>b</sup> |
|                           | mRS                     | 0.091               | n.s.              | -0.203              | n.s.              |
|                           | % mis-loss              | 0.309               | n.s.              | -0.438 <sup>b</sup> | .04 <sup>b</sup>  |
| Collateralization         | Infarct growth          | 0.299               | n.s.              | -0.456 <sup>b</sup> | .033 <sup>b</sup> |
|                           | mRS                     | 0.069               | n.s.              | -0.522 <sup>b</sup> | .018 <sup>b</sup> |
|                           | % mis-loss              | 0.394               | n.s.              | 0.248               | n.s.              |
| TIMI score                | Infarct growth          | -0.015              | n.s.              | 0.091               | n.s.              |
|                           | mRS                     | -0.544 <sup>b</sup> | .002 <sup>b</sup> | 0.045               | n.s.              |
|                           | % mis-loss              | -0.422 <sup>b</sup> | .018 <sup>b</sup> | -0.316              | n.s.              |
| TTR                       | Infarct growth          | 0.12                | n.s.              | -0.111              | n.s.              |
|                           | mRS                     | 0.21                | n.s.              | 0.3                 | n.s.              |
|                           | % mis-loss              | 0.206               | n.s.              | 0.262               | n.s.              |
| Age                       | Infarct growth          | -0.138              | n.s.              | -0.213              | n.s.              |
|                           | mRS                     | 0.439 <sup>b</sup>  | .038 <sup>b</sup> | 0.247               | n.s.              |
|                           | % mis-loss              | -0.189              | n.s.              | -0.366              | n.s.              |

**Note:**—% mis-loss, percent mismatch lost; n.s., not significant.

<sup>a</sup> Spearman correlations.

<sup>b</sup>  $P < 0.05$ .

**On-line Table 2: Multivariate analysis with main effects and interactions for mismatch and recanalization success (TIMI score) and collateralization for tissue outcome and mRS score<sup>a</sup>**

| CT/DSA/Clinical Parameter | Tissue/Clinical Outcome | Whole Group        |                    | Penumbra Group    |                   |
|---------------------------|-------------------------|--------------------|--------------------|-------------------|-------------------|
|                           |                         | F Value            | Significance       | F Value           | Significance      |
| Mismatch                  | Infarct growth          | 11.6 <sup>b</sup>  | .002 <sup>b</sup>  | 86 <sup>b</sup>   | .005 <sup>b</sup> |
|                           | mRS                     | 1.1                | n.s.               | 0.3               | n.s.              |
|                           | % mis-loss              | 80.7 <sup>b</sup>  | <.001 <sup>b</sup> | 18.3 <sup>b</sup> | .008 <sup>b</sup> |
| TIMI                      | Infarct growth          | 6.9 <sup>b</sup>   | .020 <sup>b</sup>  | 0.4               | n.s.              |
|                           | mRS                     | 1.5                | n.s.               | 2.8               | n.s.              |
|                           | % mis-loss              | 135.4 <sup>b</sup> | <.001 <sup>b</sup> | 6.1               | 0.4               |
| TTR                       | Infarct growth          | 9.9 <sup>b</sup>   | .002 <sup>b</sup>  | 30.6 <sup>b</sup> | .002 <sup>b</sup> |
|                           | mRS                     | 1.5                | n.s.               | 1.5               | n.s.              |
|                           | % mis-loss              | 2.3                | n.s.               | 1.8               | n.s.              |
| Collateralization         | Infarct growth          | 3.5 <sup>b</sup>   | .036 <sup>b</sup>  | 1.5               | n.s.              |
|                           | mRS                     | 0.4                | n.s.               | 0.5               | n.s.              |
|                           | % mis-loss              | 1.3                | n.s.               | 0.2               | n.s.              |
| TTR vs TIMI               | Infarct growth          | 4.1 <sup>b</sup>   | .038 <sup>b</sup>  | 4.1               | n.s.              |
|                           | mRS                     | 0.9                | n.s.               | 4.1 <sup>b</sup>  | .042 <sup>b</sup> |
|                           | % mis-loss              | 6.9                | n.s.               | 4.6               | n.s.              |
| Mismatch vs TIMI          | Infarct growth          | 7.1 <sup>b</sup>   | 0.01               | 6.9 <sup>b</sup>  | .009 <sup>b</sup> |
|                           | mRS                     | 0.8                | n.s.               | 1.0               | n.s.              |
|                           | % mis-loss              | 124.9 <sup>b</sup> | <.001 <sup>b</sup> | 0.0               | n.s.              |

**Note:**—% mis-loss, percent mismatch lost; n.s., not significant.

<sup>a</sup> Multivariate analysis.

<sup>b</sup>  $P < 0.05$ .
